# Supplementary material
Source: PubMed Central journal article supplement (PMC4787974)
Supplement: rebm836445.wf1_default.pdf [file rebm836445.wf1_default.pdf]

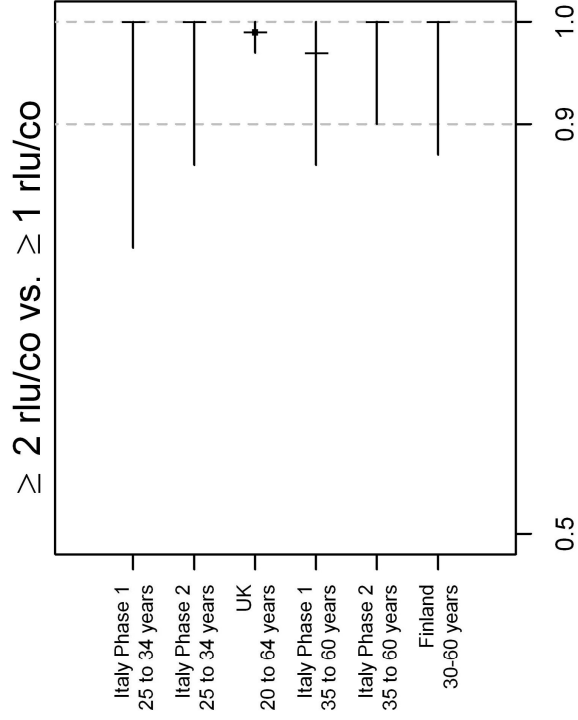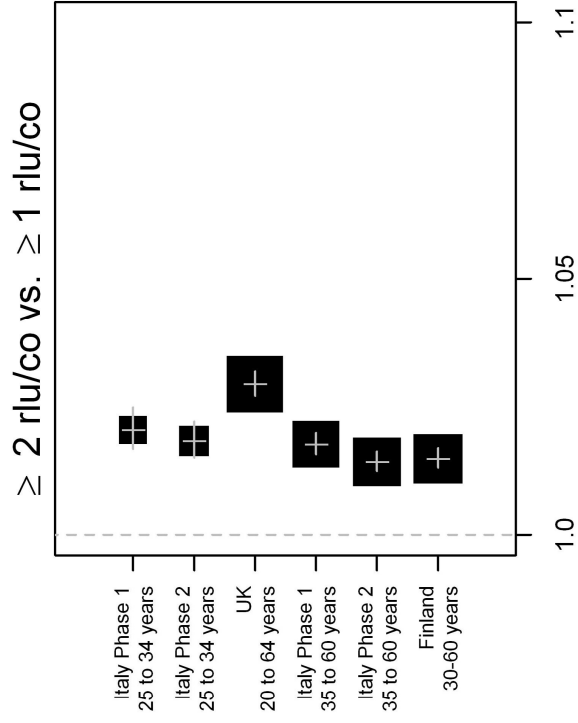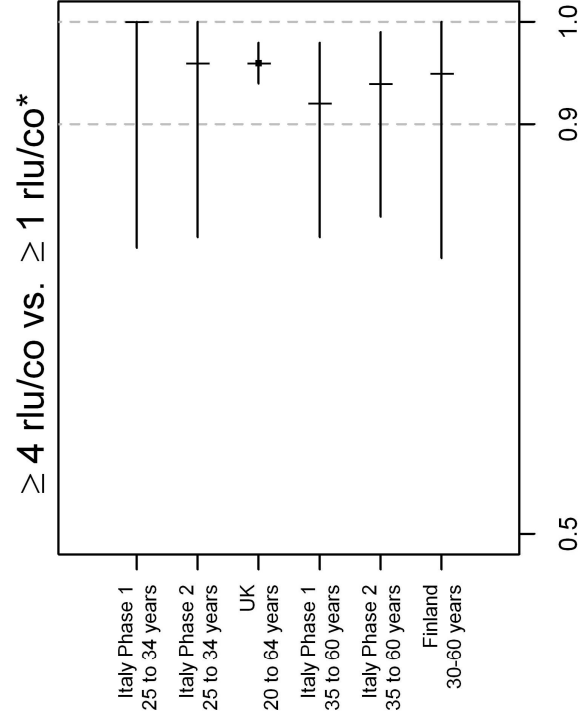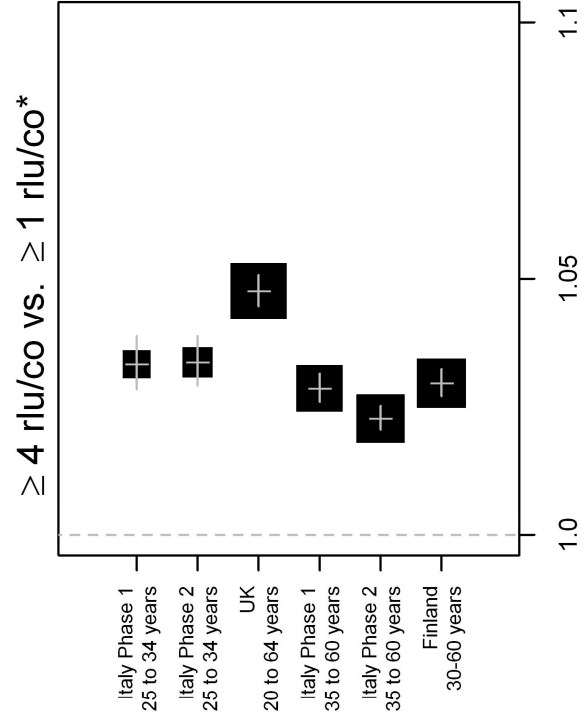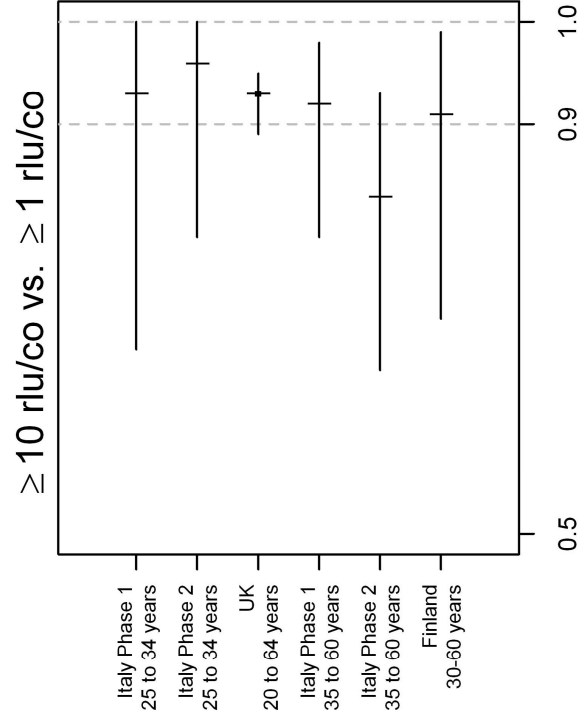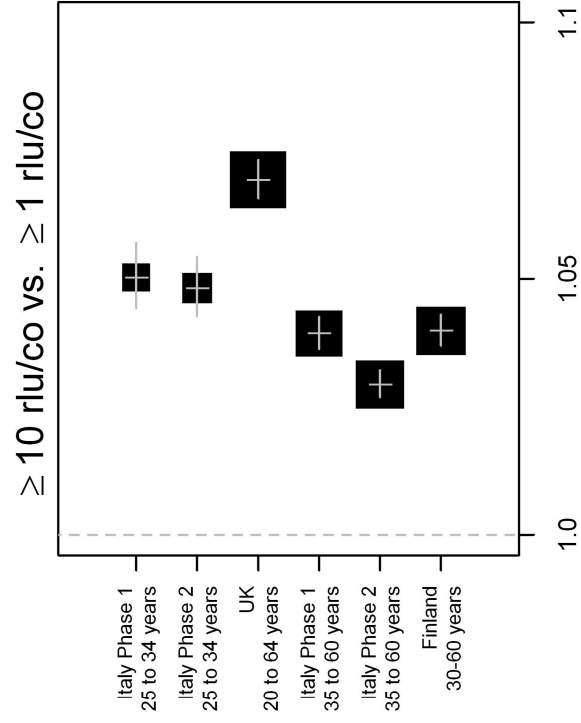

Relative sensitivity for cervical intraepithelial neoplasia grade 3 or higher

Relative specificity for cervical intraepithelial neoplasia grade 3 or higher
