# Supplementary material
Source: PubMed Central journal article supplement (PMC4787974)
Supplement: rebm836445.ww1_default.pdf [file rebm836445.ww1_default.pdf]

## Appendix

PubMed search terms

Step 1.

("randomized controlled trial"[Publication Type] OR "randomized controlled trials as topic"[MeSH Terms])

AND

((("humans"[MeSH Terms] OR "humans"[All Fields] OR "human"[All Fields]) AND ("papillomaviridae"[MeSH Terms] OR "papillomaviridae"[All Fields] OR "papillomavirus"[All Fields])) OR "Papillomaviridae"[Mesh] OR "Papillomavirus Infections"[Mesh:noexp])

AND

("Carcinoma in Situ"[Mesh:noexp] OR "Cervical Intraepithelial Neoplasia"[Mesh] OR "Uterine Cervical Dysplasia"[Mesh] OR "Uterine Cervical Neoplasms"[Mesh])

Step 2.

((("humans"[MeSH Terms] OR "humans"[All Fields] OR "human"[All Fields]) AND ("papillomaviridae"[MeSH Terms] OR "papillomaviridae"[All Fields] OR "papillomavirus"[All Fields])) OR "Papillomaviridae"[Mesh] OR "Papillomavirus Infections"[Mesh:noexp])

AND

(NTCC OR ARTISTIC OR CCCaST OR "HPV FOCAL" OR Ronco OR Kitchener OR Peto OR Franco OR Sankaranarayanan OR Anttila OR Coldman OR Ogilvie OR Wright)

Limits: published until end of August 2010
